# Supplementary figures and images for: Exploration of the Microstructure and Rheological Properties of Sodium Alginate-Pectin-Whey Protein Isolate Stabilized Β-Carotene Emulsions: To Improve Stability and Achieve Gastrointestinal Sustained Release
Source: MDPI journal article supplement (doi:10.3390/foods10091991), 2021-08-25

## Supplementary Materials

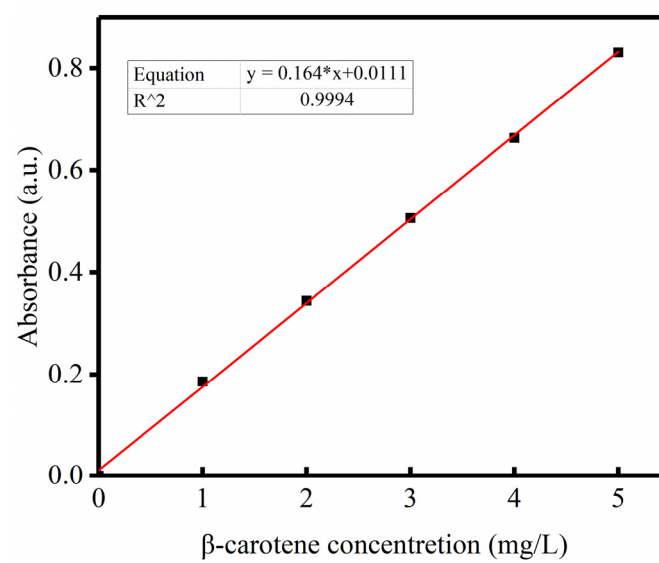

**Figure S1.** Standard curve of β-carotene.

Supplement: s1 [file s1]
